# Supplementary material for: Single nucleotide polymorphisms within the Wnt pathway predict the risk of bone metastasis in patients with non-small cell lung cancer
Source: publisher site journal article supplement (doi:10.18632/aging.103207), 2020-05-26
Supplement: Supplementary file [file aging-v12i10-103207-supplementary-material-SD1.pdf]

## SUPPLEMENTARY FIGURE

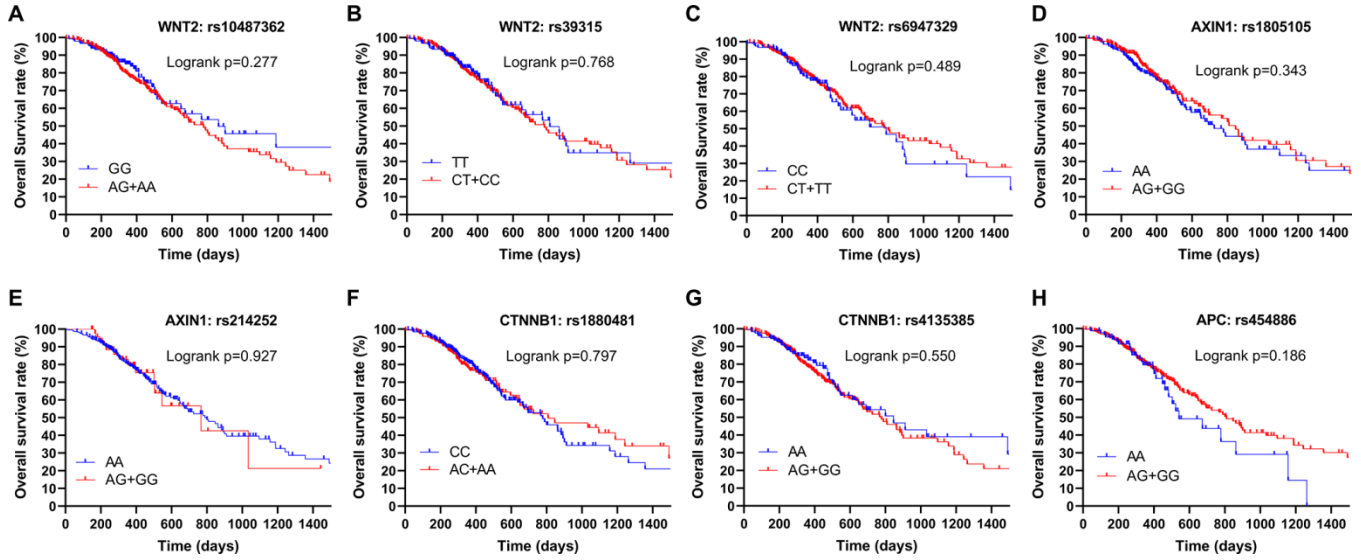

**Supplementary Figure 1.** Evaluation of the overall survival rate of NSCLC patients according to the following genotypes: (A) WNT2: rs10487362, (B) WNT2: rs39315, (C) WNT2: rs6947329, (D) AXIN1: rs1805105, (E) AXIN1: rs214252, (F) CTNNB1: rs1880481, (G) CTNNB1: rs4135385, (H) APC: rs454886.
